# Supplementary material
Source: publisher figshare collection journal article supplement (https://future-science-group.figshare.com/ndownloader/files/34851033)

**Survival curves of COVID-19 patients depending on the presence of antibiotic-associated diarrhea (AAD) and *Clostridioides difficile* infection (CDI)**

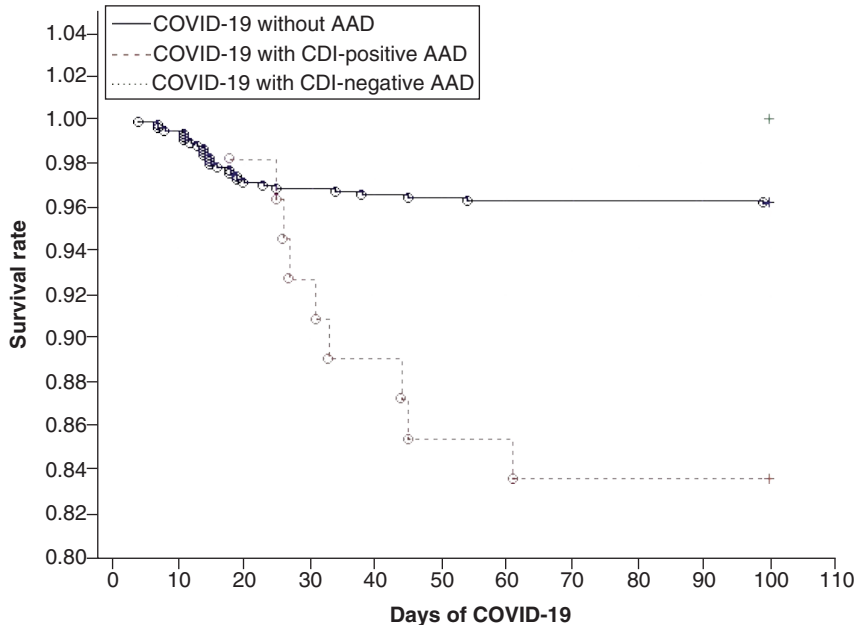

Supplement: Supplementary file [file 34851033]
